# Supplementary material for: Analysis of Exosomal MicroRNA Dynamics in Response to Rhinovirus Challenge in a Longitudinal Case-Control Study of Asthma
Source: Viruses. 2022 Nov 3;14(11):2444. doi: 10.3390/v14112444 (PMC9695046; doi:10.3390/v14112444)
Supplement: Supplementary file 1 [file viruses-14-02444-s001.zip]

Archive with 10 entries (10 files):
- Figure S1.png
- Figure S2.png
- Figure S3.png
- Figure S4A. upclustergeneinref.txt.png
- Figure S4B. downclustergeneinref.txt.png
- Supplementary_material.pdf
- Supplementary_Tables_cca.xlsx
- Supplementary_Tables_enriched_GO_terms.xlsx
- Supplementary_Tables_full_list_of_DE_miRNAs.xlsx
- Supplementary_Tables_target_genes.xlsx
