# Supplementary material for: Analysis of Exosomal MicroRNA Dynamics in Response to Rhinovirus Challenge in a Longitudinal Case-Control Study of Asthma
Source: Viruses. 2022 Nov 3;14(11):2444. doi: 10.3390/v14112444 (PMC9695046; doi:10.3390/v14112444)
Supplement: Supplementary file 1 [file viruses-14-02444-s001.zip › Supplementary_Tables_cca.xlsx]

## Sheet: Table S4 cca
		DE miRNAs	Upregulated Cluster	Downregulated Cluster
Th1	IFN-γ	0.493	0.373
	IP-10	0.257	0.144
Th2	IL-13	0.468		-0.348
Th17	IL-17A	0.485		0.383
Reg	IL-10		0.382
Pulmonary function	FVC%	0.464		0.386
	FEV1%	0.372		0.256
	PEF%	0.149		0.16
Inflammatory biomarkers	FeNO			0.384
	Eosinophils%			0.0692
	Neutrophils%			0.0685
