# Supplementary material for: Analysis of Exosomal MicroRNA Dynamics in Response to Rhinovirus Challenge in a Longitudinal Case-Control Study of Asthma
Source: Viruses. 2022 Nov 3;14(11):2444. doi: 10.3390/v14112444 (PMC9695046; doi:10.3390/v14112444)
Supplement: Supplementary file 1 [file viruses-14-02444-s001.zip › Supplementary_Tables_enriched_GO_terms.xlsx]

## Sheet: Table S8. GO_DE_miRNAs
GO term	Count	P-Value	Fisher Exact
defense response to virus	22	1.1e-10	1.7e-11
negative regulation of viral genome replication	12	1.5e-10	7.2e-12
response to virus	13	3.6e-07	4.7e-08
type I interferon signaling pathway	10	1.8e-06	1.7e-07
T cell costimulation	6	0.0018	0.00025
RNA catabolic process	5	0.0025	0.00025
regulation of transcription, DNA-templated	29	0.0027	0.0014
positive regulation of apoptotic process	15	0.0039	0.0015
macromolecular complex assembly	8	0.0058	0.0014
epidermal growth factor receptor signaling pathway	5	0.0089	0.0013
protein phosphorylation	17	0.0093	0.0042
defense response	6	0.0095	0.0019
viral process	16	0.012	0.0053
positive regulation of type I interferon production	5	0.012	0.002
cellular response to virus	5	0.012	0.002
response to interferon-beta	3	0.013	0.00065
cellular response to interleukin-1	6	0.015	0.0032
protein polyubiquitination	11	0.017	0.0067
cytokine-mediated signaling pathway	12	0.018	0.0073
glycosaminoglycan metabolic process	3	0.018	0.0011
positive regulation of phosphatidylinositol 3-kinase signaling	6	0.019	0.0045
membrane organization	7	0.02	0.0056
protein sumoylation	5	0.021	0.004
heparan sulfate proteoglycan biosynthetic process	3	0.021	0.0014
regulation of transcription from RNA polymerase II promoter	40	0.022	0.015
interleukin-27-mediated signaling pathway	3	0.024	0.0017
protein transport	14	0.025	0.012
RNA phosphodiester bond hydrolysis, endonucleolytic	5	0.026	0.0055
brain development	10	0.027	0.011
positive regulation of GTPase activity	11	0.03	0.013
dendritic cell chemotaxis	3	0.031	0.0025
mitotic chromosome condensation	4	0.031	0.0048
positive regulation of interferon-beta production	4	0.031	0.0048
response to glucose	5	0.033	0.0073
phospholipid transport	4	0.033	0.0053
inositol phosphate dephosphorylation	3	0.034	0.003
regulation of cellular response to heat	5	0.037	0.0086
activation of protein kinase A activity	3	0.038	0.0035
innate immune response	17	0.04	0.022
positive regulation of protein export from nucleus	3	0.042	0.004
NLS-bearing protein import into nucleus	3	0.042	0.004
regulation of signal transduction by p53 class mediator	7	0.042	0.014
regulation of G2/M transition of mitotic cell cycle	5	0.045	0.011
proteasome-mediated ubiquitin-dependent protein catabolic process	8	0.047	0.018
positive regulation of transcription, DNA-templated	18	0.048	0.027
copper ion transmembrane transport	2	0.048	0.00079
mitotic nuclear envelope reassembly	4	0.051	0.0097
negative regulation of viral entry into host cell	3	0.054	0.0061
response to toxic substance	5	0.054	0.014
negative regulation of transcription, DNA-templated	16	0.055	0.03
apoptotic process	16	0.055	0.031
cellular response to interferon-beta	3	0.058	0.0068
adrenal gland development	3	0.058	0.0068
MAPK cascade	10	0.062	0.029
carbohydrate metabolic process	7	0.063	0.024
regulation of ribonuclease activity	2	0.064	0.0016
positive regulation of mitochondrial ATP synthesis coupled electron transport	2	0.064	0.0016
regulation of Rap protein signal transduction	2	0.064	0.0016
positive regulation of intracellular protein transport	3	0.067	0.0086
inflammatory response	12	0.068	0.035
ciliary basal body docking	5	0.07	0.02
nucleus organization	3	0.071	0.0095
negative regulation of T cell receptor signaling pathway	3	0.071	0.0095
protein autophosphorylation	7	0.074	0.028
interleukin-1-mediated signaling pathway	5	0.075	0.022
positive regulation of release of cytochrome c from mitochondria	3	0.076	0.011
cellular response to glucagon stimulus	3	0.076	0.011
positive regulation of protein complex disassembly	2	0.079	0.0026
positive regulation of toll-like receptor 9 signaling pathway	2	0.079	0.0026
G2/M transition of mitotic cell cycle	6	0.08	0.028
cellular response to tumor necrosis factor	6	0.082	0.029
regulation of circadian rhythm	4	0.09	0.022
activation of innate immune response	3	0.091	0.014
immune response	13	0.093	0.052
cellular response to progesterone stimulus	2	0.094	0.0038
negative regulation of smoothened signaling pathway involved in dorsal/ventral neural tube patterning	2	0.094	0.0038
positive regulation of toll-like receptor 7 signaling pathway	2	0.094	0.0038
positive regulation of p38MAPK cascade	3	0.096	0.015
positive regulation of mitotic cell cycle	3	0.096	0.015
blood coagulation	7	0.097	0.04
positive regulation of smooth muscle cell proliferation	4	0.1	0.025

## Sheet: Table S9. GO_Upregulated
GO term	Count	P-Value	Fisher Exact
defense response to virus	11	4.5e-05	8.1e-06
negative regulation of viral genome replication	6	6.6e-05	4.2e-06
response to virus	8	9.6e-05	1.2e-05
type I interferon signaling pathway	6	0.00046	4.5e-05
epidermal growth factor receptor signaling pathway	5	0.0012	0.0001
positive regulation of phosphatidylinositol 3-kinase signaling	6	0.0019	0.00025
protein phosphorylation	13	0.0028	0.00096
RNA phosphodiester bond hydrolysis, endonucleolytic	5	0.0039	0.00047
response to glucose	5	0.005	0.00065
glycosaminoglycan metabolic process	3	0.0063	0.00021
heparan sulfate proteoglycan biosynthetic process	3	0.0073	0.00027
macromolecular complex assembly	6	0.0076	0.0015
viral process	11	0.013	0.0051
protein polyubiquitination	8	0.016	0.005
cellular response to insulin stimulus	5	0.019	0.0036
negative regulation of viral entry into host cell	3	0.019	0.0012
negative regulation of transcription, DNA-templated	12	0.02	0.0086
adrenal gland development	3	0.021	0.0014
positive regulation of apoptotic process	9	0.026	0.0094
membrane organization	5	0.033	0.0076
brain development	7	0.034	0.011
regulation of cellular response to heat	4	0.035	0.0059
positive regulation of mitotic cell cycle	3	0.036	0.0033
positive regulation of p38MAPK cascade	3	0.036	0.0033
positive regulation of mitochondrial ATP synthesis coupled electron transport	2	0.037	0.00052
defense response	4	0.037	0.0065
protein localization to nucleus	3	0.042	0.0042
insulin receptor signaling pathway	4	0.042	0.0077
positive regulation of protein complex disassembly	2	0.046	0.00085
apoptotic process	11	0.047	0.022
response to toxic substance	4	0.048	0.009
membrane fusion	3	0.051	0.0057
cellular response to progesterone stimulus	2	0.055	0.0013
mitotic metaphase plate congression	3	0.056	0.0066
mitotic spindle assembly	3	0.056	0.0066
regulation of signal transduction by p53 class mediator	5	0.057	0.015
mitotic chromosome condensation	3	0.058	0.0071
toxin metabolic process	2	0.063	0.0018
cerebellar granule cell precursor proliferation	2	0.063	0.0018
MAPK cascade	7	0.065	0.025
positive regulation of insulin secretion	3	0.066	0.0086
regulation of transcription, DNA-templated	15	0.07	0.04
miRNA loading onto RISC involved in gene silencing by miRNA	2	0.072	0.0023
positive regulation of histone phosphorylation	2	0.072	0.0023
ventricular cardiac muscle cell development	2	0.081	0.003
chondroitin sulfate proteoglycan biosynthetic process	2	0.081	0.003
hyperosmotic response	2	0.081	0.003
forelimb morphogenesis	2	0.081	0.003
male gonad development	4	0.082	0.019
mitotic nuclear envelope reassembly	3	0.082	0.012
cytokine-mediated signaling pathway	7	0.082	0.033
protein autophosphorylation	5	0.086	0.027
cellular response to organic cyclic compound	3	0.087	0.013
T cell costimulation	3	0.09	0.014
regulation of transcription initiation from RNA polymerase II promoter	3	0.09	0.014
glucose homeostasis	4	0.09	0.022
positive regulation of protein complex assembly	3	0.093	0.015
cell migration	6	0.094	0.035
protein folding	5	0.095	0.03
dendritic spine maintenance	2	0.098	0.0045
response to interferon-alpha	2	0.098	0.0045
negative regulation of fat cell differentiation	3	0.099	0.016

## Sheet: Table S10. GO_Downregulated
GO term	Count	P-Value	Fisher Exact
negative regulation of viral genome replication	8	4.3e-07	2.2e-08
defense response to virus	14	5.6e-07	8.7e-08
response to virus	9	2.4e-05	3e-06
type I interferon signaling pathway	6	0.00074	8.1e-05
viral process	13	0.0039	0.0014
protein polyubiquitination	9	0.0089	0.0027
defense response	5	0.0091	0.0014
positive regulation of interferon-beta production	4	0.0093	0.00093
phospholipid transport	4	0.0099	0.001
positive regulation of protein export from nucleus	3	0.018	0.0011
brain development	8	0.018	0.0058
proteasome-mediated ubiquitin-dependent protein catabolic process	7	0.018	0.0051
cellular response to virus	4	0.019	0.0025
negative regulation of apoptotic process	12	0.023	0.01
negative regulation of viral entry into host cell	3	0.023	0.0017
adrenal gland development	3	0.025	0.0019
protein sumoylation	4	0.029	0.0044
regulation of transcription from RNA polymerase II promoter	27	0.031	0.019
carbohydrate metabolic process	6	0.033	0.0093
protein transport	10	0.035	0.015
protein autophosphorylation	6	0.039	0.011
regulation of ribonuclease activity	2	0.041	0.00064
apoptotic process	12	0.041	0.019
positive regulation of apoptotic process	9	0.043	0.018
positive regulation of transcription, DNA-templated	13	0.045	0.022
response to ethanol	5	0.045	0.011
membrane organization	5	0.046	0.012
macromolecular complex assembly	5	0.047	0.012
regulation of heart rate	3	0.051	0.0057
positive regulation of protein complex disassembly	2	0.051	0.0011
positive regulation of toll-like receptor 9 signaling pathway	2	0.051	0.0011
cytokine-mediated signaling pathway	8	0.051	0.02
negative regulation of smoothened signaling pathway involved in dorsal/ventral neural tube patterning	2	0.06	0.0016
cellular response to progesterone stimulus	2	0.06	0.0016
positive regulation of toll-like receptor 7 signaling pathway	2	0.06	0.0016
cellular response to interleukin-1	4	0.063	0.013
cellular senescence	3	0.064	0.0082
endosome organization	3	0.064	0.0082
positive regulation of respiratory burst	2	0.07	0.0022
toxin metabolic process	2	0.07	0.0022
positive regulation of protein import into nucleus	3	0.073	0.01
positive regulation of phosphatidylinositol 3-kinase signaling	4	0.074	0.017
protein monoubiquitination	3	0.079	0.011
miRNA loading onto RISC involved in gene silencing by miRNA	2	0.08	0.0029
depyrimidination	2	0.08	0.0029
protein phosphorylation	10	0.08	0.039
positive regulation of MAPK cascade	5	0.084	0.025
steroid metabolic process	3	0.085	0.013
endosome to lysosome transport	3	0.085	0.013
cellular response to muramyl dipeptide	2	0.089	0.0037
nucleoside triphosphate biosynthetic process	2	0.089	0.0037
thyroid hormone metabolic process	2	0.089	0.0037
epidermal growth factor receptor signaling pathway	3	0.094	0.015
response to UV-C	2	0.099	0.0046
regulation of protein processing	2	0.099	0.0046
myeloid cell homeostasis	2	0.099	0.0046
positive regulation of GTPase activity	7	0.1	0.042
