# Supplementary material for: Analysis of Exosomal MicroRNA Dynamics in Response to Rhinovirus Challenge in a Longitudinal Case-Control Study of Asthma
Source: Viruses. 2022 Nov 3;14(11):2444. doi: 10.3390/v14112444 (PMC9695046; doi:10.3390/v14112444)
Supplement: Supplementary file 1 [file viruses-14-02444-s001.zip › Supplementary_Tables_full_list_of_DE_miRNAs.xlsx]

## Sheet: Table S1. between-challenged
miRNAs	adj. p-value
hsa-miR-122-5p	0
hsa-miR-148a-3p	0
hsa-let-7f-5p	1.67e-124
hsa-miR-26a-5p	2.51e-106
hsa-let-7a-5p	1.04e-79
hsa-miR-92a-3p	1.2e-68
hsa-miR-21-5p	1.21e-47
hsa-miR-126-3p	3.3e-28
hsa-miR-30c-5p	4.91e-24
hsa-miR-101-3p	7.01e-23
hsa-miR-151a-3p	2.69e-15
hsa-miR-451a	4.31e-15
hsa-miR-375-3p	7.85e-13
hsa-miR-10b-5p	3.93e-12
hsa-miR-22-3p	1.08e-11
hsa-miR-223-5p	3.17e-10
hsa-miR-199a-3p	1.25e-06
hsa-miR-423-5p	4.85e-06
hsa-miR-671-3p	5.52e-06
hsa-miR-221-5p	5.94e-06
hsa-miR-103a-3p	7.41e-06
hsa-miR-1-3p	6.45e-05
hsa-miR-127-3p	9.65e-05
hsa-miR-4433b-3p	0.000113274
hsa-miR-99a-5p	0.000136084
hsa-miR-425-3p	0.000182005

## Sheet: Table S2. within-healthy
miRNAs	adj. p-value
hsa-let-7a-5p	9.3e-218
hsa-miR-451a	3.65e-99
hsa-miR-151a-3p	5.56e-92
hsa-let-7f-5p	3.81e-68
hsa-let-7b-5p	1.37e-66
hsa-miR-148a-3p	3.44e-39
hsa-miR-126-3p	7.33e-37
hsa-miR-4326	8.43e-37
hsa-let-7i-5p	1.15e-36
hsa-miR-26a-5p	4.03e-31
hsa-miR-21-5p	1.18e-25
hsa-miR-122-5p	2.76e-21
hsa-miR-10b-5p	1.65e-19
hsa-miR-32-5p	2.06e-16
hsa-miR-1-3p	6.92e-16
hsa-miR-22-3p	3.98e-14
hsa-miR-7-5p	9.01e-14
hsa-miR-185-5p	6.88e-13
hsa-let-7d-5p	5.62e-12
hsa-miR-143-3p	1.6e-11
hsa-miR-142-3p	3.02e-11
hsa-miR-320a-3p	5.86e-11
hsa-miR-7706	6.84e-11
hsa-miR-95-3p	8.1e-11
hsa-let-7e-5p	5.73e-09
hsa-miR-127-3p	2.15e-08
hsa-miR-486-5p	3.61e-08
hsa-miR-941	3.62e-08
hsa-let-7d-3p	4.66e-08
hsa-miR-501-3p	8.19e-08
hsa-miR-10a-5p	8.7e-08
hsa-miR-133a-3p	1.12e-07
hsa-miR-28-3p	2.65e-07
hsa-miR-92a-3p	3.06e-07
hsa-miR-423-5p	3.14e-07
hsa-miR-98-5p	3.73e-07
hsa-miR-486-3p	6.06e-07
hsa-miR-330-3p	1.13e-06
hsa-miR-142-5p	1.14e-06
hsa-miR-19a-3p	2.71e-06
hsa-miR-199a-5p	4.45e-06
hsa-miR-320b	6.16e-06
hsa-miR-125a-5p	6.33e-06
hsa-miR-450a-5p	7.26e-06
hsa-miR-11400	2.21e-05
hsa-miR-340-5p	2.72e-05
hsa-miR-1908-5p	4.1e-05
hsa-miR-320d	8.2e-05
hsa-miR-485-5p	0.000188068

## Sheet: Table S3. within-asthmatic
miRNAs	adj. p-value
hsa-let-7a-5p	0
hsa-miR-148a-3p	0
hsa-let-7f-5p	2e-218
hsa-miR-26a-5p	1.88e-150
hsa-miR-451a	1.42e-103
hsa-miR-151a-3p	3.83e-100
hsa-miR-21-5p	2.76e-79
hsa-miR-92a-3p	8.76e-71
hsa-let-7b-5p	4.57e-67
hsa-miR-126-3p	1.54e-64
hsa-let-7i-5p	4.34e-37
hsa-miR-4326	8.52e-36
hsa-miR-10b-5p	3.42e-32
hsa-miR-122-5p	6.74e-27
hsa-miR-30c-5p	1.41e-26
hsa-miR-101-3p	6.46e-23
hsa-miR-1-3p	1.87e-17
hsa-miR-32-5p	2.22e-15
hsa-miR-185-5p	2.26e-14
hsa-miR-143-3p	7.83e-14
hsa-miR-7-5p	8.07e-14
hsa-miR-423-5p	1.86e-13
hsa-miR-375-3p	4.58e-13
hsa-miR-127-3p	4.51e-11
hsa-let-7d-5p	4.52e-11
hsa-miR-142-3p	7.21e-11
hsa-miR-223-5p	1.24e-10
hsa-miR-7706	1.95e-10
hsa-miR-320a-3p	2.23e-10
hsa-miR-22-3p	5.14e-10
hsa-let-7e-5p	6.04e-10
hsa-miR-486-5p	1.97e-09
hsa-miR-181a-2-3p	6.43e-09
hsa-miR-330-3p	7.35e-09
hsa-miR-19a-3p	9.53e-09
hsa-miR-10a-5p	3.39e-08
hsa-miR-199a-3p	3.73e-08
hsa-let-7d-3p	6.57e-08
hsa-miR-133a-3p	1.09e-07
hsa-miR-142-5p	2.08e-07
hsa-miR-103a-3p	3.3e-07
hsa-miR-941	4.41e-07
hsa-miR-99a-5p	4.52e-07
hsa-miR-199a-5p	5.1e-07
hsa-miR-28-3p	7.23e-07
hsa-miR-98-5p	1.2e-06
hsa-miR-378a-3p	3.33e-06
hsa-miR-486-3p	3.88e-06
hsa-miR-320d	4.49e-06
hsa-miR-432-5p	5.08e-06
hsa-miR-671-3p	8.38e-06
hsa-miR-221-5p	1.78e-05
hsa-miR-1260b	2.34e-05
hsa-miR-125a-5p	2.86e-05
hsa-miR-361-3p	3.81e-05
hsa-miR-450a-5p	4.12e-05
hsa-miR-485-5p	4.35e-05
hsa-miR-20a-5p	7.92e-05
hsa-miR-26b-5p	0.000121692
hsa-miR-4433b-3p	0.000124494
hsa-miR-30a-5p	0.000128632
hsa-miR-11400	0.000129417
hsa-miR-425-3p	0.000138503
hsa-miR-340-5p	0.000138887
