# Supplementary material for: Analysis of Exosomal MicroRNA Dynamics in Response to Rhinovirus Challenge in a Longitudinal Case-Control Study of Asthma
Source: Viruses. 2022 Nov 3;14(11):2444. doi: 10.3390/v14112444 (PMC9695046; doi:10.3390/v14112444)
Supplement: Supplementary file 1 [file viruses-14-02444-s001.zip › Supplementary_Tables_target_genes.xlsx]

## Sheet: Table S5 DE miRNAs target genes
miRNAs	Target genes
hsa-miR-1-3p	C5orf51
hsa-miR-1-3p	VAMP2
hsa-miR-1-3p	UNC119B
hsa-miR-1-3p	CLTC
hsa-miR-1-3p	FAM101B
hsa-miR-1-3p	BRI3BP
hsa-miR-1-3p	CBL
hsa-miR-1-3p	SLC8A1
hsa-miR-1-3p	FBXL20
hsa-miR-1-3p	CBX6
hsa-miR-1-3p	CD2AP
hsa-miR-1-3p	RORA
hsa-miR-1-3p	RNF44
hsa-miR-1-3p	ZMYND11
hsa-miR-1-3p	PFKFB2
hsa-miR-1-3p	CREB5
hsa-miR-1-3p	SLC31A1
hsa-miR-1-3p	DICER1
hsa-miR-1-3p	CPSF7
hsa-miR-1-3p	SPATS2L
hsa-miR-10b-5p	ZMYND11
hsa-miR-10b-5p	INHBB
hsa-miR-103a-3p	SPATS2L
hsa-miR-103a-3p	DLEU7
hsa-miR-103a-3p	AGO1
hsa-miR-103a-3p	ERLIN1
hsa-miR-103a-3p	MYBL1
hsa-miR-103a-3p	FBXL20
hsa-miR-103a-3p	EML5
hsa-miR-103a-3p	ZCCHC2
hsa-miR-103a-3p	SGMS2
hsa-miR-103a-3p	ABHD2
hsa-miR-103a-3p	MAP3K3
hsa-miR-103a-3p	ARPC5L
hsa-miR-103a-3p	ARIH1
hsa-miR-103a-3p	INADL
hsa-miR-103a-3p	ZBTB16
hsa-miR-103a-3p	RORA
hsa-miR-103a-3p	PLEKHA7
hsa-miR-103a-3p	CAMKK1
hsa-miR-103a-3p	PITPNA
hsa-miR-103a-3p	ATXN1
hsa-miR-103a-3p	DICER1
hsa-miR-103a-3p	UBXN7
hsa-miR-103a-3p	RPS6KA5
hsa-miR-103a-3p	FBXL18
hsa-miR-103a-3p	SLC8A1
hsa-miR-122-5p	FKBP5
hsa-miR-122-5p	NT5C3A
hsa-miR-122-5p	GCNT4
hsa-miR-122-5p	SLC39A8
hsa-miR-122-5p	GNPDA1
hsa-miR-122-5p	CBL
hsa-miR-122-5p	AGO1
hsa-miR-122-5p	RBM47
hsa-miR-122-5p	DICER1
hsa-miR-127-3p	RAB37
hsa-miR-148a-3p	ARRDC3
hsa-miR-148a-3p	INHBB
hsa-miR-148a-3p	AGFG1
hsa-miR-148a-3p	MAP3K4
hsa-miR-148a-3p	AGO1
hsa-miR-148a-3p	LMTK2
hsa-miR-148a-3p	SYNJ1
hsa-miR-148a-3p	CPEB4
hsa-miR-148a-3p	ERLIN1
hsa-miR-148a-3p	ATXN1
hsa-miR-148a-3p	RNF44
hsa-miR-148a-3p	ZCCHC2
hsa-miR-148a-3p	MYBL1
hsa-miR-148a-3p	UBE4B
hsa-miR-148a-3p	ZBTB16
hsa-miR-148a-3p	EXTL3
hsa-miR-148a-3p	ARAP2
hsa-miR-148a-3p	MGAT4A
hsa-miR-148a-3p	TMEM164
hsa-miR-148a-3p	RORA
hsa-miR-148a-3p	CPD
hsa-miR-148a-3p	DICER1
hsa-miR-151a-3p	ARL17B
hsa-miR-151a-3p	PITPNA
hsa-miR-151a-3p	CEP41
hsa-miR-151a-3p	PSME3
hsa-miR-151a-3p	INSR
hsa-miR-199a-3p	CD2AP
hsa-miR-199a-3p	DIRC2
hsa-miR-199a-3p	MAP3K4
hsa-miR-199a-3p	TFAM
hsa-miR-199a-3p	CPEB4
hsa-miR-199a-3p	NACC2
hsa-miR-199a-3p	RBM47
hsa-miR-199a-3p	PDE7B
hsa-miR-199a-3p	CHP1
hsa-miR-199a-3p	RCOR1
hsa-miR-199a-3p	CHMP5
hsa-miR-199a-3p	RORA
hsa-miR-199a-3p	REPS2
hsa-miR-199a-3p	DDI2
hsa-miR-21-5p	RSAD2
hsa-miR-21-5p	ARHGAP24
hsa-miR-21-5p	RAB22A
hsa-miR-21-5p	RASGRP1
hsa-miR-21-5p	PFKM
hsa-miR-21-5p	HRK
hsa-miR-21-5p	PDZD2
hsa-miR-21-5p	EXTL3
hsa-miR-21-5p	GAB1
hsa-miR-21-5p	MEGF9
hsa-miR-21-5p	FMN1
hsa-miR-21-5p	MTHFD1
hsa-miR-22-3p	SYNE1
hsa-miR-22-3p	TRIB2
hsa-miR-22-3p	CBL
hsa-miR-22-3p	RIC8B
hsa-miR-22-3p	RCOR1
hsa-miR-22-3p	FBXO41
hsa-miR-22-3p	CBX6
hsa-miR-22-3p	PCNP
hsa-miR-22-3p	RNF44
hsa-miR-22-3p	TMEM164
hsa-miR-22-3p	TNFRSF13C
hsa-miR-22-3p	PLAGL2
hsa-miR-22-3p	RAB5B
hsa-miR-22-3p	ICOSLG
hsa-miR-22-3p	AGO1
hsa-miR-22-3p	ZBTB16
hsa-miR-22-3p	KHDRBS2
hsa-miR-22-3p	PDZD4
hsa-miR-22-3p	AGMAT
hsa-miR-221-5p	ZFP69B
hsa-miR-221-5p	ZSCAN5A
hsa-miR-221-5p	DNAJB6
hsa-miR-221-5p	POM121
hsa-miR-221-5p	LILRA1
hsa-miR-221-5p	ZNF425
hsa-miR-221-5p	BRI3BP
hsa-miR-221-5p	S1PR1
hsa-miR-221-5p	IFITM3
hsa-miR-221-5p	ARL17B
hsa-miR-221-5p	ZNF850
hsa-miR-221-5p	TNFRSF9
hsa-miR-221-5p	IRGQ
hsa-miR-221-5p	GNPDA1
hsa-miR-221-5p	ZNF512B
hsa-miR-221-5p	GALNT14
hsa-miR-221-5p	ZNF44
hsa-miR-221-5p	CBL
hsa-miR-221-5p	ZBP1
hsa-miR-221-5p	SIDT2
hsa-miR-221-5p	NEIL2
hsa-miR-221-5p	PARP14
hsa-miR-221-5p	SLC31A1
hsa-miR-221-5p	ZMYND11
hsa-miR-221-5p	EOMES
hsa-miR-221-5p	PFKFB2
hsa-miR-221-5p	CLN6
hsa-miR-221-5p	ARHGEF40
hsa-miR-221-5p	MDM2
hsa-miR-221-5p	INHBB
hsa-miR-221-5p	ZMIZ1
hsa-miR-221-5p	PHF21A
hsa-miR-221-5p	GAS8
hsa-miR-221-5p	UTP14A
hsa-miR-221-5p	PFKM
hsa-miR-221-5p	MAP3K3
hsa-miR-221-5p	MPZL1
hsa-miR-221-5p	ZNF766
hsa-miR-221-5p	SLC8A1
hsa-miR-221-5p	INSR
hsa-miR-221-5p	PAFAH2
hsa-miR-221-5p	C8orf37
hsa-miR-221-5p	HES4
hsa-miR-221-5p	CEP41
hsa-miR-221-5p	SPATS2L
hsa-miR-221-5p	CCL5
hsa-miR-221-5p	NUDT16
hsa-miR-221-5p	RORA
hsa-miR-221-5p	AGMAT
hsa-miR-221-5p	SLC9A7
hsa-miR-221-5p	NACC2
hsa-miR-221-5p	RIC8B
hsa-miR-221-5p	ZNF43
hsa-miR-221-5p	BAG3
hsa-miR-221-5p	EIF2AK2
hsa-miR-221-5p	UBXN7
hsa-miR-221-5p	PDPK1
hsa-miR-221-5p	RASA4
hsa-miR-221-5p	UNC119B
hsa-miR-221-5p	SGPL1
hsa-miR-221-5p	XYLT2
hsa-miR-221-5p	KLF8
hsa-miR-221-5p	RAB22A
hsa-miR-221-5p	GCNT4
hsa-miR-221-5p	FAF1
hsa-miR-221-5p	KREMEN1
hsa-miR-221-5p	SLC25A16
hsa-miR-221-5p	SCIMP
hsa-miR-221-5p	SIGLEC1
hsa-miR-221-5p	FKBP5
hsa-miR-221-5p	AGO1
hsa-miR-221-5p	MGAT4A
hsa-miR-221-5p	IMPA2
hsa-miR-221-5p	CPD
hsa-miR-221-5p	ATXN1
hsa-miR-221-5p	SETD9
hsa-miR-221-5p	FMN1
hsa-miR-221-5p	MGRN1
hsa-miR-221-5p	RBMS2
hsa-miR-221-5p	PDE7B
hsa-miR-221-5p	ELMSAN1
hsa-miR-221-5p	INADL
hsa-miR-221-5p	RERE
hsa-miR-221-5p	ANKRD50
hsa-miR-221-5p	KDELR1
hsa-miR-221-5p	TXNL4A
hsa-miR-221-5p	SUPT3H
hsa-miR-221-5p	ZNF211
hsa-miR-221-5p	DDI2
hsa-miR-221-5p	ARL14EP
hsa-miR-221-5p	SLC38A7
hsa-miR-221-5p	PPTC7
hsa-miR-221-5p	BAG2
hsa-miR-221-5p	MTHFD1
hsa-miR-221-5p	B3GAT3
hsa-miR-221-5p	ARGLU1
hsa-miR-221-5p	FCRL2
hsa-miR-221-5p	IL5RA
hsa-miR-221-5p	DAPP1
hsa-miR-221-5p	CCNB1
hsa-miR-221-5p	CLTC
hsa-miR-221-5p	PIAS2
hsa-miR-221-5p	N6AMT1
hsa-miR-223-5p	CTSE
hsa-miR-223-5p	SETD9
hsa-miR-223-5p	NOP2
hsa-miR-223-5p	BAG2
hsa-miR-223-5p	DPP4
hsa-miR-223-5p	TMEM170B
hsa-miR-223-5p	CLDND1
hsa-miR-223-5p	MACC1
hsa-miR-223-5p	ZNF441
hsa-miR-223-5p	PLIN5
hsa-miR-223-5p	RAB9A
hsa-miR-223-5p	ZNF195
hsa-miR-223-5p	MGRN1
hsa-miR-223-5p	GIMAP7
hsa-miR-223-5p	PCBD2
hsa-miR-223-5p	RAB22A
hsa-miR-223-5p	INADL
hsa-miR-223-5p	XAF1
hsa-miR-223-5p	RSAD2
hsa-miR-223-5p	PITPNB
hsa-miR-223-5p	TIGIT
hsa-miR-223-5p	SERTAD2
hsa-miR-223-5p	IFI16
hsa-miR-223-5p	EIF2AK2
hsa-miR-223-5p	BRI3BP
hsa-miR-223-5p	GPR183
hsa-miR-223-5p	FKBP5
hsa-miR-223-5p	MT-ATP8
hsa-miR-223-5p	SGMS2
hsa-miR-223-5p	FGFBP2
hsa-miR-223-5p	ZNF43
hsa-miR-223-5p	CCDC102A
hsa-miR-223-5p	EPSTI1
hsa-miR-223-5p	IL5RA
hsa-miR-223-5p	FAM84B
hsa-miR-223-5p	ELMSAN1
hsa-miR-223-5p	INPP4B
hsa-miR-223-5p	IL1R1
hsa-miR-223-5p	GBP1
hsa-miR-223-5p	ZNF850
hsa-miR-223-5p	PLEKHA7
hsa-miR-223-5p	ZNF510
hsa-miR-223-5p	FBXL20
hsa-miR-223-5p	KLF10
hsa-miR-223-5p	DDI2
hsa-miR-223-5p	EML5
hsa-miR-223-5p	RIC8B
hsa-miR-223-5p	IFIT2
hsa-miR-223-5p	GNPDA1
hsa-miR-223-5p	CEP290
hsa-miR-223-5p	RORA
hsa-miR-223-5p	IRS2
hsa-miR-223-5p	RBM14-RBM4
hsa-miR-223-5p	WDR35
hsa-miR-223-5p	CBL
hsa-miR-223-5p	GCNT4
hsa-miR-223-5p	DENND1A
hsa-miR-223-5p	ZDBF2
hsa-miR-223-5p	PDCL3
hsa-miR-223-5p	ATP11A
hsa-miR-223-5p	FCRL6
hsa-miR-223-5p	IGF1R
hsa-miR-223-5p	CCR5
hsa-miR-223-5p	LRRC28
hsa-miR-223-5p	N6AMT1
hsa-miR-223-5p	HIST1H2BF
hsa-miR-223-5p	ZNF678
hsa-miR-223-5p	TIMP2
hsa-miR-223-5p	GAB1
hsa-miR-223-5p	CD96
hsa-miR-223-5p	TMEM164
hsa-miR-223-5p	ZNF84
hsa-miR-223-5p	ZNF681
hsa-miR-223-5p	IL1RAP
hsa-miR-223-5p	AGFG1
hsa-miR-223-5p	SYNJ1
hsa-miR-223-5p	PNPT1
hsa-miR-223-5p	CD248
hsa-miR-223-5p	ZCCHC2
hsa-miR-223-5p	FBXL18
hsa-miR-223-5p	SPATA6
hsa-miR-223-5p	CEP41
hsa-miR-223-5p	ARL14EP
hsa-miR-223-5p	ZMYND11
hsa-miR-223-5p	PIAS2
hsa-miR-223-5p	ZFP82
hsa-miR-223-5p	S1PR1
hsa-miR-223-5p	TFAM
hsa-miR-223-5p	LMTK2
hsa-miR-223-5p	AGO1
hsa-miR-223-5p	ARRDC3
hsa-miR-223-5p	CPEB4
hsa-miR-223-5p	PARP14
hsa-miR-223-5p	DHX33
hsa-miR-223-5p	NUP35
hsa-miR-223-5p	RPS6KA5
hsa-miR-223-5p	CPD
hsa-miR-223-5p	MGAT4A
hsa-miR-223-5p	NUDT16
hsa-miR-223-5p	PDE7B
hsa-miR-223-5p	SUPT3H
hsa-miR-223-5p	SLC25A16
hsa-miR-223-5p	RBMS2
hsa-miR-223-5p	AGMAT
hsa-miR-223-5p	SLC8A1
hsa-miR-223-5p	REPS2
hsa-miR-223-5p	IFIT5
hsa-miR-223-5p	PSME3
hsa-miR-223-5p	TRIM5
hsa-miR-223-5p	KDELR1
hsa-miR-223-5p	MCM4
hsa-miR-223-5p	ZNF304
hsa-miR-223-5p	LARS2
hsa-miR-223-5p	COQ4
hsa-miR-223-5p	UFSP2
hsa-miR-223-5p	DIRC2
hsa-miR-223-5p	LILRA1
hsa-miR-223-5p	FAF1
hsa-miR-223-5p	CTLA4
hsa-miR-223-5p	CCNB1
hsa-miR-223-5p	TNFRSF9
hsa-miR-223-5p	B4GALT1
hsa-miR-223-5p	SLFN12L
hsa-miR-223-5p	PLSCR1
hsa-miR-223-5p	SPATS2L
hsa-miR-223-5p	TBC1D30
hsa-miR-223-5p	GIMAP1
hsa-miR-26a-5p	ZCCHC24
hsa-miR-26a-5p	INHBB
hsa-miR-26a-5p	KLF10
hsa-miR-26a-5p	VPS37B
hsa-miR-26a-5p	FAF1
hsa-miR-30c-5p	TRIO
hsa-miR-30c-5p	GADD45GIP1
hsa-miR-423-5p	PRKACA
hsa-miR-423-5p	S1PR1
hsa-miR-423-5p	DAAM2
hsa-miR-423-5p	FKBP5
hsa-miR-423-5p	RAB5B
hsa-miR-423-5p	KCNC3
hsa-miR-423-5p	MAP3K3
hsa-miR-423-5p	AK1
hsa-miR-425-3p	ZCCHC24
hsa-miR-425-3p	HIST1H3G
hsa-miR-425-3p	PLIN5
hsa-miR-425-3p	RNF44
hsa-miR-425-3p	ZFP41
hsa-miR-425-3p	ZFP41
hsa-miR-425-3p	ZFP69B
hsa-miR-425-3p	EXOSC10
hsa-miR-425-3p	TNFRSF13C
hsa-miR-425-3p	KCNC3
hsa-miR-425-3p	IFI44L
hsa-miR-425-3p	HES4
hsa-miR-425-3p	MDM2
hsa-miR-425-3p	CBX6
hsa-miR-425-3p	LMTK2
hsa-miR-425-3p	ZNF43
hsa-miR-425-3p	EIF2AK2
hsa-miR-425-3p	TBL1X
hsa-miR-425-3p	HMCES
hsa-miR-425-3p	UBXN7
hsa-miR-425-3p	CREB5
hsa-miR-425-3p	REPS2
hsa-miR-425-3p	ICOSLG
hsa-miR-425-3p	PSME3
hsa-miR-425-3p	ZNF766
hsa-miR-425-3p	SLC25A16
hsa-miR-425-3p	DDI2
hsa-miR-425-3p	DHX58
hsa-miR-4433b-3p	TMEM169
hsa-miR-4433b-3p	EBLN2
hsa-miR-4433b-3p	MAPK11
hsa-miR-4433b-3p	TP53INP2
hsa-miR-4433b-3p	BTN3A3
hsa-miR-4433b-3p	FANCE
hsa-miR-4433b-3p	CBL
hsa-miR-4433b-3p	HERC6
hsa-miR-4433b-3p	HIST1H3C
hsa-miR-4433b-3p	NT5C3A
hsa-miR-4433b-3p	MDM2
hsa-miR-4433b-3p	SLC31A2
hsa-miR-4433b-3p	CAMKK1
hsa-miR-4433b-3p	IFI6
hsa-miR-4433b-3p	BCL2L11
hsa-miR-4433b-3p	FKBP5
hsa-miR-4433b-3p	TMEM170B
hsa-miR-4433b-3p	ZCCHC8
hsa-miR-4433b-3p	STAT4
hsa-miR-4433b-3p	DOCK5
hsa-miR-4433b-3p	PCNP
hsa-miR-4433b-3p	SKAP2
hsa-miR-4433b-3p	B3GALT2
hsa-miR-4433b-3p	MRPS18B
hsa-miR-4433b-3p	KCNC3
hsa-miR-4433b-3p	PGM5
hsa-miR-4433b-3p	CD40LG
hsa-miR-4433b-3p	CTSE
hsa-miR-4433b-3p	ZBTB16
hsa-miR-4433b-3p	SAMD9L
hsa-miR-4433b-3p	TRIM5
hsa-miR-4433b-3p	RAB37
hsa-miR-4433b-3p	PFKFB2
hsa-miR-4433b-3p	B4GALT1
hsa-miR-4433b-3p	NEIL2
hsa-miR-4433b-3p	ZFP69B
hsa-miR-4433b-3p	RSAD2
hsa-miR-4433b-3p	WDR92
hsa-miR-4433b-3p	MYBL1
hsa-miR-4433b-3p	SPATA6
hsa-miR-4433b-3p	PPTC7
hsa-miR-4433b-3p	ZNF594
hsa-miR-4433b-3p	TNFRSF9
hsa-miR-4433b-3p	LARGE
hsa-miR-4433b-3p	EOMES
hsa-miR-4433b-3p	ZNF3
hsa-miR-4433b-3p	CMPK2
hsa-miR-4433b-3p	MGRN1
hsa-miR-4433b-3p	ANKMY2
hsa-miR-4433b-3p	ST6GALNAC3
hsa-miR-4433b-3p	PHF21A
hsa-miR-4433b-3p	PI4K2B
hsa-miR-4433b-3p	MPZL1
hsa-miR-4433b-3p	TNFRSF13C
hsa-miR-4433b-3p	FBXL18
hsa-miR-4433b-3p	AGFG1
hsa-miR-4433b-3p	AGO1
hsa-miR-4433b-3p	BRI3BP
hsa-miR-4433b-3p	GAB1
hsa-miR-4433b-3p	RCOR1
hsa-miR-4433b-3p	NUDT16
hsa-miR-4433b-3p	ZNF468
hsa-miR-4433b-3p	AP3S2
hsa-miR-4433b-3p	IKZF2
hsa-miR-4433b-3p	IL1R1
hsa-miR-4433b-3p	TYW3
hsa-miR-4433b-3p	PARP14
hsa-miR-4433b-3p	TBC1D30
hsa-miR-4433b-3p	PSME3
hsa-miR-4433b-3p	HMCES
hsa-miR-4433b-3p	IRGQ
hsa-miR-4433b-3p	IGF1R
hsa-miR-4433b-3p	EIF2AK2
hsa-miR-4433b-3p	TSR1
hsa-miR-4433b-3p	ABHD2
hsa-miR-4433b-3p	INPP4B
hsa-miR-4433b-3p	ZNF600
hsa-miR-4433b-3p	MGAT4A
hsa-miR-4433b-3p	RBMS2
hsa-miR-4433b-3p	UBXN7
hsa-miR-4433b-3p	KIF11
hsa-miR-4433b-3p	ZMIZ1
hsa-miR-4433b-3p	DCPS
hsa-miR-4433b-3p	SUPT3H
hsa-miR-4433b-3p	ZNF510
hsa-miR-4433b-3p	PDZD2
hsa-miR-4433b-3p	SULT1B1
hsa-miR-4433b-3p	DENND1A
hsa-miR-4433b-3p	FBXO41
hsa-miR-4433b-3p	INSR
hsa-miR-4433b-3p	PLSCR1
hsa-miR-4433b-3p	RIC8B
hsa-miR-4433b-3p	KLF8
hsa-miR-4433b-3p	TXNL4A
hsa-miR-4433b-3p	SETD9
hsa-miR-4433b-3p	KLF10
hsa-miR-4433b-3p	SLFN12L
hsa-miR-4433b-3p	SLC8A1
hsa-miR-4433b-3p	PLAGL2
hsa-miR-4433b-3p	GAS7
hsa-miR-4433b-3p	KDELR1
hsa-miR-4433b-3p	ICOSLG
hsa-miR-4433b-3p	EXOC2
hsa-miR-4433b-3p	LRRC28
hsa-miR-4433b-3p	DICER1
hsa-miR-4433b-3p	SLC38A7
hsa-miR-4433b-3p	RAB5B
hsa-miR-4433b-3p	DLGAP5
hsa-miR-4433b-3p	MTHFD1
hsa-miR-4433b-3p	LILRA1
hsa-miR-4433b-3p	RGPD5
hsa-miR-4433b-3p	SMC4
hsa-miR-4433b-3p	BLVRA
hsa-miR-4433b-3p	IFIT1
hsa-miR-4433b-3p	FAM219A
hsa-miR-671-3p	UPRT
hsa-miR-671-3p	SLC39A7
hsa-miR-671-3p	IL1R1
hsa-miR-671-3p	CREB5
hsa-miR-671-3p	INSR
hsa-miR-671-3p	DHX58
hsa-miR-671-3p	PSME3
hsa-miR-671-3p	IGF1R
hsa-miR-671-3p	AGO1
hsa-miR-671-3p	EFCAB2
hsa-miR-671-3p	MGRN1
hsa-miR-671-3p	ABHD2
hsa-miR-671-3p	ZCCHC24
hsa-miR-671-3p	EXTL3
hsa-miR-671-3p	CD248
hsa-miR-671-3p	REPS2
hsa-miR-671-3p	AK1
hsa-miR-671-3p	ZNF512B
hsa-let-7a-5p	ARRDC4
hsa-let-7a-5p	KLF8
hsa-let-7a-5p	KCNC3
hsa-let-7a-5p	B3GAT3
hsa-miR-101-3p	ENPP4
hsa-miR-101-3p	DHX33
hsa-miR-101-3p	EXTL3
hsa-miR-101-3p	TRIO
hsa-miR-101-3p	ARAP2
hsa-miR-101-3p	TNFRSF9
hsa-miR-101-3p	ATP11A
hsa-miR-101-3p	BCL3
hsa-miR-101-3p	RORA
hsa-miR-101-3p	MGAT4A
hsa-miR-101-3p	UNG
hsa-miR-101-3p	PIAS2
hsa-miR-101-3p	SP140
hsa-miR-101-3p	CLDND1
hsa-miR-101-3p	PCNP
hsa-miR-101-3p	OXCT1
hsa-miR-101-3p	CHMP5
hsa-miR-101-3p	OAS1
hsa-miR-101-3p	PEBP1
hsa-miR-101-3p	AGO1
hsa-miR-101-3p	FKBP5
hsa-miR-101-3p	DICER1
hsa-miR-101-3p	TBL1X
hsa-miR-101-3p	MGRN1
hsa-miR-101-3p	MEGF9
hsa-miR-101-3p	GAB1
hsa-miR-101-3p	CPEB4
hsa-miR-101-3p	SMC4
hsa-miR-101-3p	IFIH1
hsa-miR-101-3p	PDCL3
hsa-miR-101-3p	IL1R1
hsa-miR-101-3p	ID2
hsa-miR-101-3p	SCP2
hsa-miR-101-3p	ZNF211
hsa-miR-101-3p	RAB22A
hsa-miR-101-3p	ATXN1
hsa-miR-101-3p	PLAGL2
hsa-miR-101-3p	CHI3L1
hsa-miR-101-3p	PTPN22
hsa-miR-101-3p	ARGLU1
hsa-miR-101-3p	OASL
hsa-miR-101-3p	HRK
hsa-miR-101-3p	PHF21A
hsa-miR-101-3p	RTP4
hsa-miR-101-3p	SLC31A2
hsa-miR-101-3p	CYP1B1
hsa-miR-101-3p	HERC6
hsa-miR-101-3p	SLC39A8
hsa-miR-101-3p	AMIGO2
hsa-miR-101-3p	IGF1R
hsa-miR-101-3p	ARRDC4
hsa-miR-101-3p	SSH2
hsa-miR-101-3p	CLTC
hsa-miR-101-3p	ZCCHC2
hsa-miR-101-3p	TXNL4A
hsa-miR-101-3p	IFITM3
hsa-miR-101-3p	PRKACB
hsa-miR-101-3p	TUFT1
hsa-miR-101-3p	NVL
hsa-miR-101-3p	SETD7
hsa-miR-101-3p	RNF44
hsa-miR-101-3p	TIAM2
hsa-miR-101-3p	ANKRD50
hsa-miR-101-3p	BAG3
hsa-miR-101-3p	BCL2L11
hsa-miR-101-3p	FAM69A
hsa-miR-101-3p	KLF10
hsa-miR-101-3p	N6AMT1
hsa-miR-101-3p	GALNT14
hsa-miR-101-3p	RHPN1
hsa-miR-101-3p	LY6E
hsa-miR-101-3p	NCSTN
hsa-miR-101-3p	LMTK2
hsa-miR-101-3p	ARHGEF40
hsa-miR-101-3p	SGPL1
hsa-miR-101-3p	CDK1
hsa-miR-101-3p	PDE7B
hsa-miR-101-3p	AGFG1
hsa-miR-101-3p	PCCA
hsa-miR-101-3p	SAMD9L
hsa-miR-101-3p	ITLN1
hsa-miR-101-3p	RNF182
hsa-miR-101-3p	PITPNB
hsa-miR-101-3p	ZFP82
hsa-miR-101-3p	ZNF678
hsa-miR-101-3p	ZFP41
hsa-miR-101-3p	KPNA2
hsa-miR-101-3p	SLC8A1
hsa-miR-101-3p	CAMK1D
hsa-miR-101-3p	KREMEN1
hsa-miR-101-3p	ZNF600
hsa-miR-101-3p	C8orf76
hsa-miR-101-3p	TDRD7
hsa-miR-101-3p	POM121
hsa-miR-101-3p	ZNF512B
hsa-miR-101-3p	PPTC7
hsa-miR-101-3p	CD2AP
hsa-miR-101-3p	TTC37
hsa-miR-101-3p	CIPC
hsa-miR-101-3p	GPRASP1
hsa-miR-101-3p	EFCAB2
hsa-miR-101-3p	ZDBF2
hsa-miR-101-3p	TMEM170B
hsa-miR-101-3p	C5orf51
hsa-miR-101-3p	PPAPDC2
hsa-miR-101-3p	FLJ22447
hsa-miR-101-3p	ZNF850
hsa-miR-101-3p	HIST1H2AB
hsa-miR-126-3p	PARP12
hsa-miR-126-3p	TRMT11
hsa-miR-126-3p	RORA
hsa-miR-126-3p	MCM6
hsa-miR-126-3p	CLDND1
hsa-miR-126-3p	AGO1
hsa-miR-126-3p	DICER1
hsa-miR-126-3p	NPM3
hsa-miR-126-3p	TFAM
hsa-miR-126-3p	IFIT2
hsa-miR-126-3p	IFI6
hsa-miR-126-3p	DLGAP5
hsa-miR-126-3p	TOP2A
hsa-miR-126-3p	TRIM5
hsa-miR-126-3p	EPSTI1
hsa-miR-126-3p	CCNB1
hsa-miR-126-3p	RSAD2
hsa-miR-126-3p	NUSAP1
hsa-miR-126-3p	IFI44
hsa-miR-126-3p	CYP1B1
hsa-miR-126-3p	KIF11
hsa-miR-126-3p	ARHGAP24
hsa-miR-126-3p	KLRG1
hsa-miR-126-3p	IGF1R
hsa-miR-126-3p	PDPK1
hsa-miR-126-3p	PLK4
hsa-miR-126-3p	CREB5
hsa-miR-126-3p	BCL2L11
hsa-miR-126-3p	TMEM164
hsa-miR-126-3p	MX1
hsa-miR-126-3p	NAE1
hsa-miR-126-3p	LY6E
hsa-miR-126-3p	RFC4
hsa-miR-126-3p	UBXN7
hsa-miR-126-3p	IRGQ
hsa-miR-126-3p	TSR1
hsa-miR-126-3p	FEN1
hsa-miR-126-3p	RNASE2
hsa-miR-126-3p	CDK1
hsa-miR-126-3p	PDE7B
hsa-miR-126-3p	MRPL57
hsa-miR-126-3p	GIMAP7
hsa-miR-126-3p	HIST3H2A
hsa-miR-126-3p	RELL1
hsa-miR-126-3p	SH2D1A
hsa-miR-126-3p	IFIT1
hsa-miR-126-3p	IRS2
hsa-miR-126-3p	PRKAR1B
hsa-miR-126-3p	POM121
hsa-miR-126-3p	ZNF624
hsa-miR-126-3p	MAP3K3
hsa-miR-126-3p	SAMD9
hsa-miR-126-3p	DNAJC19
hsa-miR-126-3p	KIFC1
hsa-miR-126-3p	EBLN2
hsa-miR-126-3p	HIST1H2BM
hsa-miR-126-3p	HIST1H2AJ
hsa-miR-126-3p	HIST1H2BF
hsa-miR-126-3p	HIST1H3C
hsa-miR-126-3p	HIST1H2AB

## Sheet: Table S6 Up target genes
miRNAs	Target genes
hsa-miR-1-3p	C5orf51
hsa-miR-1-3p	VAMP2
hsa-miR-1-3p	UNC119B
hsa-miR-1-3p	CLTC
hsa-miR-1-3p	FAM101B
hsa-miR-1-3p	BRI3BP
hsa-miR-1-3p	CBL
hsa-miR-1-3p	SLC8A1
hsa-miR-1-3p	FBXL20
hsa-miR-1-3p	CBX6
hsa-miR-1-3p	CD2AP
hsa-miR-1-3p	RORA
hsa-miR-1-3p	RNF44
hsa-miR-1-3p	ZMYND11
hsa-miR-1-3p	PFKFB2
hsa-miR-1-3p	CREB5
hsa-miR-1-3p	SLC31A1
hsa-miR-1-3p	DICER1
hsa-miR-1-3p	CPSF7
hsa-miR-1-3p	SPATS2L
hsa-miR-103a-3p	SPATS2L
hsa-miR-103a-3p	DLEU7
hsa-miR-103a-3p	AGO1
hsa-miR-103a-3p	ERLIN1
hsa-miR-103a-3p	MYBL1
hsa-miR-103a-3p	FBXL20
hsa-miR-103a-3p	EML5
hsa-miR-103a-3p	ZCCHC2
hsa-miR-103a-3p	SGMS2
hsa-miR-103a-3p	ABHD2
hsa-miR-103a-3p	MAP3K3
hsa-miR-103a-3p	ARPC5L
hsa-miR-103a-3p	ARIH1
hsa-miR-103a-3p	INADL
hsa-miR-103a-3p	ZBTB16
hsa-miR-103a-3p	RORA
hsa-miR-103a-3p	PLEKHA7
hsa-miR-103a-3p	CAMKK1
hsa-miR-103a-3p	PITPNA
hsa-miR-103a-3p	ATXN1
hsa-miR-103a-3p	DICER1
hsa-miR-103a-3p	UBXN7
hsa-miR-103a-3p	RPS6KA5
hsa-miR-103a-3p	FBXL18
hsa-miR-103a-3p	SLC8A1
hsa-miR-199a-3p	CD2AP
hsa-miR-199a-3p	DIRC2
hsa-miR-199a-3p	MAP3K4
hsa-miR-199a-3p	TFAM
hsa-miR-199a-3p	CPEB4
hsa-miR-199a-3p	NACC2
hsa-miR-199a-3p	RBM47
hsa-miR-199a-3p	PDE7B
hsa-miR-199a-3p	CHP1
hsa-miR-199a-3p	RCOR1
hsa-miR-199a-3p	CHMP5
hsa-miR-199a-3p	RORA
hsa-miR-199a-3p	REPS2
hsa-miR-199a-3p	DDI2
hsa-miR-21-5p	RSAD2
hsa-miR-21-5p	ARHGAP24
hsa-miR-21-5p	RAB22A
hsa-miR-21-5p	RASGRP1
hsa-miR-21-5p	PFKM
hsa-miR-21-5p	HRK
hsa-miR-21-5p	PDZD2
hsa-miR-21-5p	EXTL3
hsa-miR-21-5p	GAB1
hsa-miR-21-5p	MEGF9
hsa-miR-21-5p	FMN1
hsa-miR-21-5p	MTHFD1
hsa-miR-22-3p	SYNE1
hsa-miR-22-3p	TRIB2
hsa-miR-22-3p	CBL
hsa-miR-22-3p	RIC8B
hsa-miR-22-3p	RCOR1
hsa-miR-22-3p	FBXO41
hsa-miR-22-3p	CBX6
hsa-miR-22-3p	PCNP
hsa-miR-22-3p	RNF44
hsa-miR-22-3p	TMEM164
hsa-miR-22-3p	TNFRSF13C
hsa-miR-22-3p	PLAGL2
hsa-miR-22-3p	RAB5B
hsa-miR-22-3p	ICOSLG
hsa-miR-22-3p	AGO1
hsa-miR-22-3p	ZBTB16
hsa-miR-22-3p	KHDRBS2
hsa-miR-22-3p	PDZD4
hsa-miR-22-3p	AGMAT
hsa-miR-221-5p	ZFP69B
hsa-miR-221-5p	ZSCAN5A
hsa-miR-221-5p	DNAJB6
hsa-miR-221-5p	POM121
hsa-miR-221-5p	LILRA1
hsa-miR-221-5p	ZNF425
hsa-miR-221-5p	BRI3BP
hsa-miR-221-5p	S1PR1
hsa-miR-221-5p	IFITM3
hsa-miR-221-5p	ARL17B
hsa-miR-221-5p	ZNF850
hsa-miR-221-5p	TNFRSF9
hsa-miR-221-5p	IRGQ
hsa-miR-221-5p	GNPDA1
hsa-miR-221-5p	ZNF512B
hsa-miR-221-5p	GALNT14
hsa-miR-221-5p	ZNF44
hsa-miR-221-5p	CBL
hsa-miR-221-5p	ZBP1
hsa-miR-221-5p	SIDT2
hsa-miR-221-5p	NEIL2
hsa-miR-221-5p	PARP14
hsa-miR-221-5p	SLC31A1
hsa-miR-221-5p	ZMYND11
hsa-miR-221-5p	EOMES
hsa-miR-221-5p	PFKFB2
hsa-miR-221-5p	CLN6
hsa-miR-221-5p	ARHGEF40
hsa-miR-221-5p	MDM2
hsa-miR-221-5p	INHBB
hsa-miR-221-5p	ZMIZ1
hsa-miR-221-5p	PHF21A
hsa-miR-221-5p	GAS8
hsa-miR-221-5p	UTP14A
hsa-miR-221-5p	PFKM
hsa-miR-221-5p	MAP3K3
hsa-miR-221-5p	MPZL1
hsa-miR-221-5p	ZNF766
hsa-miR-221-5p	SLC8A1
hsa-miR-221-5p	INSR
hsa-miR-221-5p	PAFAH2
hsa-miR-221-5p	C8orf37
hsa-miR-221-5p	HES4
hsa-miR-221-5p	CEP41
hsa-miR-221-5p	SPATS2L
hsa-miR-221-5p	CCL5
hsa-miR-221-5p	NUDT16
hsa-miR-221-5p	RORA
hsa-miR-221-5p	AGMAT
hsa-miR-221-5p	SLC9A7
hsa-miR-221-5p	NACC2
hsa-miR-221-5p	RIC8B
hsa-miR-221-5p	ZNF43
hsa-miR-221-5p	BAG3
hsa-miR-221-5p	EIF2AK2
hsa-miR-221-5p	UBXN7
hsa-miR-221-5p	PDPK1
hsa-miR-221-5p	RASA4
hsa-miR-221-5p	UNC119B
hsa-miR-221-5p	SGPL1
hsa-miR-221-5p	XYLT2
hsa-miR-221-5p	KLF8
hsa-miR-221-5p	RAB22A
hsa-miR-221-5p	GCNT4
hsa-miR-221-5p	FAF1
hsa-miR-221-5p	KREMEN1
hsa-miR-221-5p	SLC25A16
hsa-miR-221-5p	SCIMP
hsa-miR-221-5p	SIGLEC1
hsa-miR-221-5p	FKBP5
hsa-miR-221-5p	AGO1
hsa-miR-221-5p	MGAT4A
hsa-miR-221-5p	IMPA2
hsa-miR-221-5p	CPD
hsa-miR-221-5p	ATXN1
hsa-miR-221-5p	SETD9
hsa-miR-221-5p	FMN1
hsa-miR-221-5p	MGRN1
hsa-miR-221-5p	RBMS2
hsa-miR-221-5p	PDE7B
hsa-miR-221-5p	ELMSAN1
hsa-miR-221-5p	INADL
hsa-miR-221-5p	RERE
hsa-miR-221-5p	ANKRD50
hsa-miR-221-5p	KDELR1
hsa-miR-221-5p	TXNL4A
hsa-miR-221-5p	SUPT3H
hsa-miR-221-5p	ZNF211
hsa-miR-221-5p	DDI2
hsa-miR-221-5p	ARL14EP
hsa-miR-221-5p	SLC38A7
hsa-miR-221-5p	PPTC7
hsa-miR-221-5p	BAG2
hsa-miR-221-5p	MTHFD1
hsa-miR-221-5p	B3GAT3
hsa-miR-221-5p	ARGLU1
hsa-miR-221-5p	FCRL2
hsa-miR-221-5p	IL5RA
hsa-miR-221-5p	DAPP1
hsa-miR-221-5p	CCNB1
hsa-miR-221-5p	CLTC
hsa-miR-221-5p	PIAS2
hsa-miR-221-5p	N6AMT1
hsa-miR-26a-5p	ZCCHC24
hsa-miR-26a-5p	INHBB
hsa-miR-26a-5p	KLF10
hsa-miR-26a-5p	VPS37B
hsa-miR-26a-5p	FAF1
hsa-miR-30c-5p	TRIO
hsa-miR-30c-5p	GADD45GIP1
hsa-let-7a-5p	ARRDC4
hsa-let-7a-5p	KLF8
hsa-let-7a-5p	KCNC3
hsa-let-7a-5p	B3GAT3
hsa-miR-126-3p	PARP12
hsa-miR-126-3p	TRMT11
hsa-miR-126-3p	RORA
hsa-miR-126-3p	MCM6
hsa-miR-126-3p	CLDND1
hsa-miR-126-3p	AGO1
hsa-miR-126-3p	DICER1
hsa-miR-126-3p	NPM3
hsa-miR-126-3p	TFAM
hsa-miR-126-3p	IFIT2
hsa-miR-126-3p	IFI6
hsa-miR-126-3p	DLGAP5
hsa-miR-126-3p	TOP2A
hsa-miR-126-3p	TRIM5
hsa-miR-126-3p	EPSTI1
hsa-miR-126-3p	CCNB1
hsa-miR-126-3p	RSAD2
hsa-miR-126-3p	NUSAP1
hsa-miR-126-3p	IFI44
hsa-miR-126-3p	CYP1B1
hsa-miR-126-3p	KIF11
hsa-miR-126-3p	ARHGAP24
hsa-miR-126-3p	KLRG1
hsa-miR-126-3p	IGF1R
hsa-miR-126-3p	PDPK1
hsa-miR-126-3p	PLK4
hsa-miR-126-3p	CREB5
hsa-miR-126-3p	BCL2L11
hsa-miR-126-3p	TMEM164
hsa-miR-126-3p	MX1
hsa-miR-126-3p	NAE1
hsa-miR-126-3p	LY6E
hsa-miR-126-3p	RFC4
hsa-miR-126-3p	UBXN7
hsa-miR-126-3p	IRGQ
hsa-miR-126-3p	TSR1
hsa-miR-126-3p	FEN1
hsa-miR-126-3p	RNASE2
hsa-miR-126-3p	CDK1
hsa-miR-126-3p	PDE7B
hsa-miR-126-3p	MRPL57
hsa-miR-126-3p	GIMAP7
hsa-miR-126-3p	HIST3H2A
hsa-miR-126-3p	RELL1
hsa-miR-126-3p	SH2D1A
hsa-miR-126-3p	IFIT1
hsa-miR-126-3p	IRS2
hsa-miR-126-3p	PRKAR1B
hsa-miR-126-3p	POM121
hsa-miR-126-3p	ZNF624
hsa-miR-126-3p	MAP3K3
hsa-miR-126-3p	SAMD9
hsa-miR-126-3p	DNAJC19
hsa-miR-126-3p	KIFC1
hsa-miR-126-3p	EBLN2
hsa-miR-126-3p	HIST1H2BM
hsa-miR-126-3p	HIST1H2AJ
hsa-miR-126-3p	HIST1H2BF
hsa-miR-126-3p	HIST1H3C
hsa-miR-126-3p	HIST1H2AB

## Sheet: Table S7 Down target genes
miRNAs	Target genes
hsa-miR-10b-5p	ZMYND11
hsa-miR-10b-5p	INHBB
hsa-miR-122-5p	FKBP5
hsa-miR-122-5p	NT5C3A
hsa-miR-122-5p	GCNT4
hsa-miR-122-5p	SLC39A8
hsa-miR-122-5p	GNPDA1
hsa-miR-122-5p	CBL
hsa-miR-122-5p	AGO1
hsa-miR-122-5p	RBM47
hsa-miR-122-5p	DICER1
hsa-miR-127-3p	RAB37
hsa-miR-148a-3p	ARRDC3
hsa-miR-148a-3p	INHBB
hsa-miR-148a-3p	AGFG1
hsa-miR-148a-3p	MAP3K4
hsa-miR-148a-3p	AGO1
hsa-miR-148a-3p	LMTK2
hsa-miR-148a-3p	SYNJ1
hsa-miR-148a-3p	CPEB4
hsa-miR-148a-3p	ERLIN1
hsa-miR-148a-3p	ATXN1
hsa-miR-148a-3p	RNF44
hsa-miR-148a-3p	ZCCHC2
hsa-miR-148a-3p	MYBL1
hsa-miR-148a-3p	UBE4B
hsa-miR-148a-3p	ZBTB16
hsa-miR-148a-3p	EXTL3
hsa-miR-148a-3p	ARAP2
hsa-miR-148a-3p	MGAT4A
hsa-miR-148a-3p	TMEM164
hsa-miR-148a-3p	RORA
hsa-miR-148a-3p	CPD
hsa-miR-148a-3p	DICER1
hsa-miR-151a-3p	ARL17B
hsa-miR-151a-3p	PITPNA
hsa-miR-151a-3p	CEP41
hsa-miR-151a-3p	PSME3
hsa-miR-151a-3p	INSR
hsa-miR-423-5p	PRKACA
hsa-miR-423-5p	S1PR1
hsa-miR-423-5p	DAAM2
hsa-miR-423-5p	FKBP5
hsa-miR-423-5p	RAB5B
hsa-miR-423-5p	KCNC3
hsa-miR-423-5p	MAP3K3
hsa-miR-423-5p	AK1
hsa-miR-4433b-3p	TMEM169
hsa-miR-4433b-3p	EBLN2
hsa-miR-4433b-3p	MAPK11
hsa-miR-4433b-3p	TP53INP2
hsa-miR-4433b-3p	BTN3A3
hsa-miR-4433b-3p	FANCE
hsa-miR-4433b-3p	CBL
hsa-miR-4433b-3p	HERC6
hsa-miR-4433b-3p	HIST1H3C
hsa-miR-4433b-3p	NT5C3A
hsa-miR-4433b-3p	MDM2
hsa-miR-4433b-3p	SLC31A2
hsa-miR-4433b-3p	CAMKK1
hsa-miR-4433b-3p	IFI6
hsa-miR-4433b-3p	BCL2L11
hsa-miR-4433b-3p	FKBP5
hsa-miR-4433b-3p	TMEM170B
hsa-miR-4433b-3p	ZCCHC8
hsa-miR-4433b-3p	STAT4
hsa-miR-4433b-3p	DOCK5
hsa-miR-4433b-3p	PCNP
hsa-miR-4433b-3p	SKAP2
hsa-miR-4433b-3p	B3GALT2
hsa-miR-4433b-3p	MRPS18B
hsa-miR-4433b-3p	KCNC3
hsa-miR-4433b-3p	PGM5
hsa-miR-4433b-3p	CD40LG
hsa-miR-4433b-3p	CTSE
hsa-miR-4433b-3p	ZBTB16
hsa-miR-4433b-3p	SAMD9L
hsa-miR-4433b-3p	TRIM5
hsa-miR-4433b-3p	RAB37
hsa-miR-4433b-3p	PFKFB2
hsa-miR-4433b-3p	B4GALT1
hsa-miR-4433b-3p	NEIL2
hsa-miR-4433b-3p	ZFP69B
hsa-miR-4433b-3p	RSAD2
hsa-miR-4433b-3p	WDR92
hsa-miR-4433b-3p	MYBL1
hsa-miR-4433b-3p	SPATA6
hsa-miR-4433b-3p	PPTC7
hsa-miR-4433b-3p	ZNF594
hsa-miR-4433b-3p	TNFRSF9
hsa-miR-4433b-3p	LARGE
hsa-miR-4433b-3p	EOMES
hsa-miR-4433b-3p	ZNF3
hsa-miR-4433b-3p	CMPK2
hsa-miR-4433b-3p	MGRN1
hsa-miR-4433b-3p	ANKMY2
hsa-miR-4433b-3p	ST6GALNAC3
hsa-miR-4433b-3p	PHF21A
hsa-miR-4433b-3p	PI4K2B
hsa-miR-4433b-3p	MPZL1
hsa-miR-4433b-3p	TNFRSF13C
hsa-miR-4433b-3p	FBXL18
hsa-miR-4433b-3p	AGFG1
hsa-miR-4433b-3p	AGO1
hsa-miR-4433b-3p	BRI3BP
hsa-miR-4433b-3p	GAB1
hsa-miR-4433b-3p	RCOR1
hsa-miR-4433b-3p	NUDT16
hsa-miR-4433b-3p	ZNF468
hsa-miR-4433b-3p	AP3S2
hsa-miR-4433b-3p	IKZF2
hsa-miR-4433b-3p	IL1R1
hsa-miR-4433b-3p	TYW3
hsa-miR-4433b-3p	PARP14
hsa-miR-4433b-3p	TBC1D30
hsa-miR-4433b-3p	PSME3
hsa-miR-4433b-3p	HMCES
hsa-miR-4433b-3p	IRGQ
hsa-miR-4433b-3p	IGF1R
hsa-miR-4433b-3p	EIF2AK2
hsa-miR-4433b-3p	TSR1
hsa-miR-4433b-3p	ABHD2
hsa-miR-4433b-3p	INPP4B
hsa-miR-4433b-3p	ZNF600
hsa-miR-4433b-3p	MGAT4A
hsa-miR-4433b-3p	RBMS2
hsa-miR-4433b-3p	UBXN7
hsa-miR-4433b-3p	KIF11
hsa-miR-4433b-3p	ZMIZ1
hsa-miR-4433b-3p	DCPS
hsa-miR-4433b-3p	SUPT3H
hsa-miR-4433b-3p	ZNF510
hsa-miR-4433b-3p	PDZD2
hsa-miR-4433b-3p	SULT1B1
hsa-miR-4433b-3p	DENND1A
hsa-miR-4433b-3p	FBXO41
hsa-miR-4433b-3p	INSR
hsa-miR-4433b-3p	PLSCR1
hsa-miR-4433b-3p	RIC8B
hsa-miR-4433b-3p	KLF8
hsa-miR-4433b-3p	TXNL4A
hsa-miR-4433b-3p	SETD9
hsa-miR-4433b-3p	KLF10
hsa-miR-4433b-3p	SLFN12L
hsa-miR-4433b-3p	SLC8A1
hsa-miR-4433b-3p	PLAGL2
hsa-miR-4433b-3p	GAS7
hsa-miR-4433b-3p	KDELR1
hsa-miR-4433b-3p	ICOSLG
hsa-miR-4433b-3p	EXOC2
hsa-miR-4433b-3p	LRRC28
hsa-miR-4433b-3p	DICER1
hsa-miR-4433b-3p	SLC38A7
hsa-miR-4433b-3p	RAB5B
hsa-miR-4433b-3p	DLGAP5
hsa-miR-4433b-3p	MTHFD1
hsa-miR-4433b-3p	LILRA1
hsa-miR-4433b-3p	RGPD5
hsa-miR-4433b-3p	SMC4
hsa-miR-4433b-3p	BLVRA
hsa-miR-4433b-3p	IFIT1
hsa-miR-4433b-3p	FAM219A
hsa-miR-671-3p	UPRT
hsa-miR-671-3p	SLC39A7
hsa-miR-671-3p	IL1R1
hsa-miR-671-3p	CREB5
hsa-miR-671-3p	INSR
hsa-miR-671-3p	DHX58
hsa-miR-671-3p	PSME3
hsa-miR-671-3p	IGF1R
hsa-miR-671-3p	AGO1
hsa-miR-671-3p	EFCAB2
hsa-miR-671-3p	MGRN1
hsa-miR-671-3p	ABHD2
hsa-miR-671-3p	ZCCHC24
hsa-miR-671-3p	EXTL3
hsa-miR-671-3p	CD248
hsa-miR-671-3p	REPS2
hsa-miR-671-3p	AK1
hsa-miR-671-3p	ZNF512B
hsa-miR-101-3p	ENPP4
hsa-miR-101-3p	DHX33
hsa-miR-101-3p	EXTL3
hsa-miR-101-3p	TRIO
hsa-miR-101-3p	ARAP2
hsa-miR-101-3p	TNFRSF9
hsa-miR-101-3p	ATP11A
hsa-miR-101-3p	BCL3
hsa-miR-101-3p	RORA
hsa-miR-101-3p	MGAT4A
hsa-miR-101-3p	UNG
hsa-miR-101-3p	PIAS2
hsa-miR-101-3p	SP140
hsa-miR-101-3p	CLDND1
hsa-miR-101-3p	PCNP
hsa-miR-101-3p	OXCT1
hsa-miR-101-3p	CHMP5
hsa-miR-101-3p	OAS1
hsa-miR-101-3p	PEBP1
hsa-miR-101-3p	AGO1
hsa-miR-101-3p	FKBP5
hsa-miR-101-3p	DICER1
hsa-miR-101-3p	TBL1X
hsa-miR-101-3p	MGRN1
hsa-miR-101-3p	MEGF9
hsa-miR-101-3p	GAB1
hsa-miR-101-3p	CPEB4
hsa-miR-101-3p	SMC4
hsa-miR-101-3p	IFIH1
hsa-miR-101-3p	PDCL3
hsa-miR-101-3p	IL1R1
hsa-miR-101-3p	ID2
hsa-miR-101-3p	SCP2
hsa-miR-101-3p	ZNF211
hsa-miR-101-3p	RAB22A
hsa-miR-101-3p	ATXN1
hsa-miR-101-3p	PLAGL2
hsa-miR-101-3p	CHI3L1
hsa-miR-101-3p	PTPN22
hsa-miR-101-3p	ARGLU1
hsa-miR-101-3p	OASL
hsa-miR-101-3p	HRK
hsa-miR-101-3p	PHF21A
hsa-miR-101-3p	RTP4
hsa-miR-101-3p	SLC31A2
hsa-miR-101-3p	CYP1B1
hsa-miR-101-3p	HERC6
hsa-miR-101-3p	SLC39A8
hsa-miR-101-3p	AMIGO2
hsa-miR-101-3p	IGF1R
hsa-miR-101-3p	ARRDC4
hsa-miR-101-3p	SSH2
hsa-miR-101-3p	CLTC
hsa-miR-101-3p	ZCCHC2
hsa-miR-101-3p	TXNL4A
hsa-miR-101-3p	IFITM3
hsa-miR-101-3p	PRKACB
hsa-miR-101-3p	TUFT1
hsa-miR-101-3p	NVL
hsa-miR-101-3p	SETD7
hsa-miR-101-3p	RNF44
hsa-miR-101-3p	TIAM2
hsa-miR-101-3p	ANKRD50
hsa-miR-101-3p	BAG3
hsa-miR-101-3p	BCL2L11
hsa-miR-101-3p	FAM69A
hsa-miR-101-3p	KLF10
hsa-miR-101-3p	N6AMT1
hsa-miR-101-3p	GALNT14
hsa-miR-101-3p	RHPN1
hsa-miR-101-3p	LY6E
hsa-miR-101-3p	NCSTN
hsa-miR-101-3p	LMTK2
hsa-miR-101-3p	ARHGEF40
hsa-miR-101-3p	SGPL1
hsa-miR-101-3p	CDK1
hsa-miR-101-3p	PDE7B
hsa-miR-101-3p	AGFG1
hsa-miR-101-3p	PCCA
hsa-miR-101-3p	SAMD9L
hsa-miR-101-3p	ITLN1
hsa-miR-101-3p	RNF182
hsa-miR-101-3p	PITPNB
hsa-miR-101-3p	ZFP82
hsa-miR-101-3p	ZNF678
hsa-miR-101-3p	ZFP41
hsa-miR-101-3p	KPNA2
hsa-miR-101-3p	SLC8A1
hsa-miR-101-3p	CAMK1D
hsa-miR-101-3p	KREMEN1
hsa-miR-101-3p	ZNF600
hsa-miR-101-3p	C8orf76
hsa-miR-101-3p	TDRD7
hsa-miR-101-3p	POM121
hsa-miR-101-3p	ZNF512B
hsa-miR-101-3p	PPTC7
hsa-miR-101-3p	CD2AP
hsa-miR-101-3p	TTC37
hsa-miR-101-3p	CIPC
hsa-miR-101-3p	GPRASP1
hsa-miR-101-3p	EFCAB2
hsa-miR-101-3p	ZDBF2
hsa-miR-101-3p	TMEM170B
hsa-miR-101-3p	C5orf51
hsa-miR-101-3p	PPAPDC2
hsa-miR-101-3p	FLJ22447
hsa-miR-101-3p	ZNF850
hsa-miR-101-3p	HIST1H2AB
